# Supplementary material
Source: PubMed Central journal article supplement (PMC298736)
Supplement: pnas_242719399_6.pdf [file pnas_242719399_6.pdf]

**A**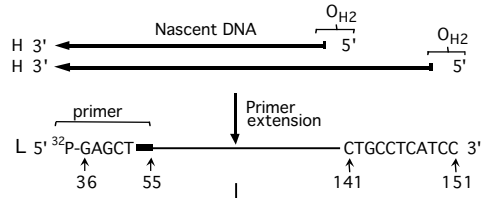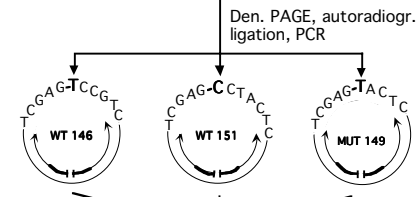

PAGE, cloning, sequencing

Observed 5' - 3' end sequence

5' -- GCC**T**GAGCT -- 3' WT 146 (27 clones of 27)

5' -- CTCATC**C**GAGCT -- 3' WT 151 (17 clones of 24)

5' -- CTCAT**T**GAGCT -- 3' MUT 149 (22 clones of 27)

▲

**B**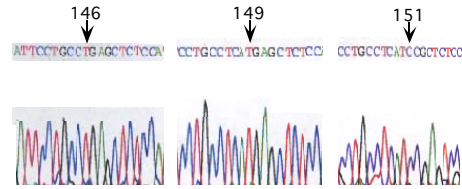**C**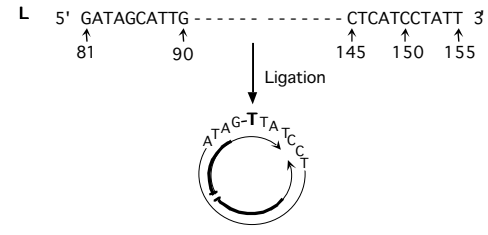

PAGE, cloning, sequencing

Observed 5' - 3' end sequence

5' -- TCCTAT**T**GATAGCA -- 3' (39 clones of 39)

▲
