# Supplementary material
Source: PubMed Central journal article supplement (PMC298736)

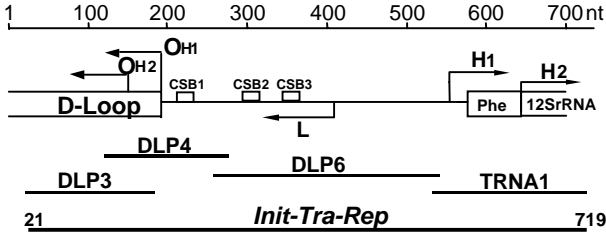

Supplement: pnas_242719399_2.pdf [file pnas_242719399_2.pdf]

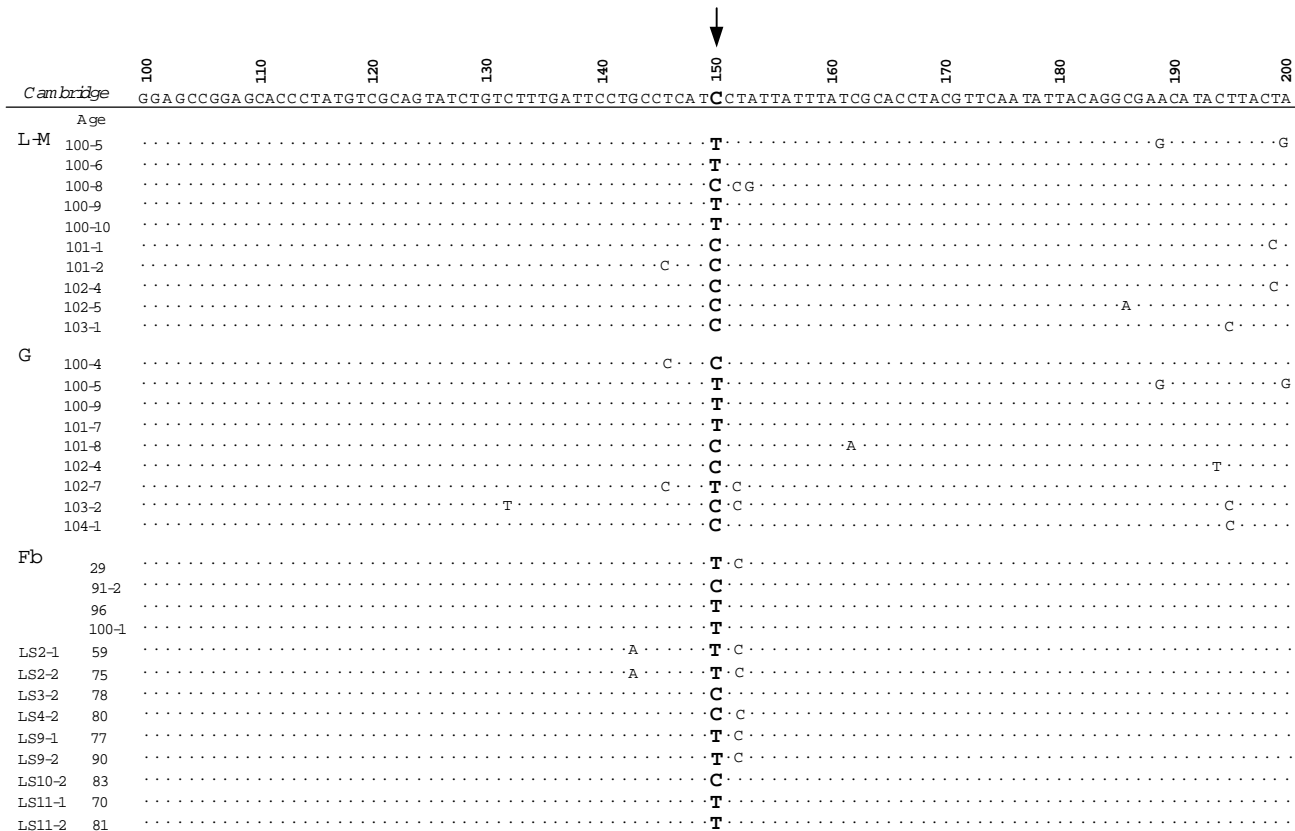

Supplement: pnas_242719399_4.pdf [file pnas_242719399_4.pdf]
